# Supplementary material
Source: HighWire-hosted journal article supplement (https://jmg.bmj.com/content/60/6/587)
Supplement: inline-supplementary-material-1 [file inline-supplementary-material-1.pdf]

**Table S1. Summary of genetic and clinical features in individuals with *SHROOM4* variations**

| Variation type           | Genetic change                                                                                                                                                    | Neurocognitive/developmental phenotype                                                                                                                                     | Other manifestations                                                                                                                                     | Reference                                         |
|--------------------------|-------------------------------------------------------------------------------------------------------------------------------------------------------------------|----------------------------------------------------------------------------------------------------------------------------------------------------------------------------|----------------------------------------------------------------------------------------------------------------------------------------------------------|---------------------------------------------------|
| SNV: missense            | NM_020717.4:<br>c.3266C>T; p.(S1089L)                                                                                                                             | four-generation pedigree with multiple affected members: severe ID, delayed or no speech, seizures, periods of depression, aggressiveness and hyperactivity, short stature | bilateral congenital hip luxation, scoliosis                                                                                                             | Stocco dos Santos et al. [3-4], Hagens et al. [5] |
|                          | NM_020717.4:<br>c.436C>T; p.(R146W)                                                                                                                               | dyspraxic gait, speech delay, eye pointing, peripheral vasomotor disturbances, microcephaly                                                                                | kyphosis, small cold hand and feet                                                                                                                       | Lopes et al. [6]                                  |
|                          | NM_020717.4:<br>c.1913C>G; p.(S638C)                                                                                                                              | Stocco dos Santos syndrome                                                                                                                                                 |                                                                                                                                                          | Farwell et al. [7]                                |
|                          | NM_020717.4:<br>c.1201C>T; p.(H401Y)                                                                                                                              | myoclonic atonic epilepsy                                                                                                                                                  |                                                                                                                                                          | Routier et al. [16]                               |
|                          | NM_020717.4:<br>c.13C>A; p.(P5T),<br>c.3236C>T; p.(E1079A),<br>c.3581C>T; p.(S1194L),<br>c.4288C>T; p.(R1430C),<br>c.4303G>A;p.(V1435M),<br>c.4331C>T; p.(P1444L) | six unrelated male individuals with idiopathic epilepsy                                                                                                                    |                                                                                                                                                          | Bian et al. [17]                                  |
| SNV: nonsense            | NM_020717.4:<br>c. 2050C>T; p.(R684*)                                                                                                                             | complete corpus callosum agenesis, Blake's pouch cyst                                                                                                                      | Turner syndrome                                                                                                                                          | Heide et al. [18]                                 |
| Structural:<br>deletions | Xp11.23p11.22;<br>2.86 Mb                                                                                                                                         | mild ID                                                                                                                                                                    |                                                                                                                                                          | Honda et al. [8]                                  |
|                          | Xp11.22;<br>0.14 Mb and 2.6 Mb                                                                                                                                    | hydrocephalus, severe growth and psychomotor retardation                                                                                                                   | Dent's disease: renal proximal tubulopathy with low-molecular-weight proteinuria, hypercalciuria, hyperaminoaciduria, hypophosphatemia and hyperuricemia | Armanet et al. [9]                                |
|                          | Xp11.23p.11.22;<br>0.7 Mb                                                                                                                                         | mild ID, speech delay, microcephaly, short stature, developmental delay                                                                                                    | short fingers with bilateral clinodactyly V, short toes,<br>Dent's disease: proteinuria, nephrocalcinosis and                                            | Danyel et al. [10]                                |

|                                          |                                                                                          |                                                                                                                                                                                                                                                    |                                                                                                                                                                                                                                                                 |                    |
|------------------------------------------|------------------------------------------------------------------------------------------|----------------------------------------------------------------------------------------------------------------------------------------------------------------------------------------------------------------------------------------------------|-----------------------------------------------------------------------------------------------------------------------------------------------------------------------------------------------------------------------------------------------------------------|--------------------|
|                                          |                                                                                          |                                                                                                                                                                                                                                                    | hypophosphatemia,<br>facial dysmorphism                                                                                                                                                                                                                         |                    |
| Structural:<br>duplications              | Xp11.23p11.22;<br>4.4 - 8.9 Mb                                                           | 12 affected individuals: 12/12 mild-severe ID, 12/12 language impairment, 11/12 psychomotor delay, 8/12 behaviour disorder (autism, aggressiveness, hyperactivity), 7/12 sleeping disorder, 6/12 epilepsy, 5/12 hypotonia, 4/12 abnormal brain MRI | 5/12 extremity abnormalities,<br>7/12 early onset of puberty, 1/12 shawl scrotum                                                                                                                                                                                | Nizon et al. [11]  |
|                                          | Xp11.23p11.22;<br>0.34 - 4.6 Mb                                                          | 9 affected individuals: 9/9 mild to severe ID, 8/9 speech delay, 7/9 attention deficit disorder, 7/9 motor delay, 4/9 autism                                                                                                                       | 6/9 hand abnormalities (clinodactyly V and/or tapering fingers), 6/9 foot abnormalities, 4/5 early onset of menses in females, 5/9 synophrys, 5/9 constipation                                                                                                  | Grams et al. [12]  |
|                                          | Xp11.23<br>3.1 Mb                                                                        | developmental delay, stereotypic movements, poor communication, autistic features                                                                                                                                                                  | broad thorax, wide-spaced nipples                                                                                                                                                                                                                               | Froyen et al. [13] |
|                                          | Xp11.22;<br>0.26 Mb (possibly disrupting <i>SHROOM4</i> locus)                           | developmental delay                                                                                                                                                                                                                                | choanal atresia, ventricle septum defect and camptodactyly                                                                                                                                                                                                      | Isrie et al. [14]  |
| Structural:<br>complex<br>rearrangements | individual 1:<br>46,X,t(X;8)(p11.2;p22.3);<br>individual 2:<br>46,X,t(X;19)(p11.2;p13.3) | two female individuals with mild to moderate ID (2/2)<br>individual 1: seizures, aggressive behavior, delayed motor skills, normal brain MRI.<br>individual 2: intrauterine growth delay, short stature, hypotrophic limbs                         | individual 1: mild hyperextensibility of fingers, mild clinodactyly V, cutaneous syndactyly II/III<br>individual 2: foot abnormalities,<br>both individuals: discrete facial dysmorphism<br>individual 2: right cardiac ventricular dysplasia of unknown origin | Hagens et al. [5]  |
|                                          | dup(X)(p11.22p11.21);<br>4.6 Mb duplication and insertion                                | moderate developmental delay, autism spectrum disorder                                                                                                                                                                                             |                                                                                                                                                                                                                                                                 | Dong et al. [15]   |
